# Supplementary material for: Sorting Rare ALS Genetic Variants by Targeted Re-Sequencing Panel in Italian Patients: OPTN, VCP, and SQSTM1 Variants Account for 3% of Rare Genetic Forms
Source: PubMed Central journal article supplement (PMC7073901; doi:10.3390/jcm9020412), 2020-02-03
Supplement: jcm-09-00412-s001.pdf [file jcm-09-00412-s001.pdf]

**Supplementary Table S1. Reference sequences for transcript (NM) and protein (NP) of genes analyzed.**

| <b>Gene</b>      | <b>RefSeq mRNAs</b>     | <b>RefSeq proteins</b>  |
|------------------|-------------------------|-------------------------|
| <i>ALS2</i>      | NM_020919.3             | NP_065970.2             |
| <i>ANG</i>       | NM_001145.4             | NP_001136.1             |
| <i>APEX1</i>     | NM_001244249            | NP_001231178            |
| <i>ASAH1</i>     | NM_004315.4             | NP_004306.3             |
| <i>ATXN2</i>     | NM_002973.3             | NP_002964.3             |
| <i>BSCL2</i>     | NM_001122955.3          | NP_001116427            |
| <i>CHCHD10</i>   | NM_213720               | NP_998885               |
| <i>CHMP2B</i>    | NM_014043.3             | NP_054762.2             |
| <i>CRYM</i>      | NM_001888.3             | NP_001879.1             |
| <i>CYP27A1</i>   | NM_000784.3             | NP_000775.1             |
| <i>DAO</i>       | NM_001917.4             | NP_001908.3             |
| <i>DCTN1</i>     | NM_004082.4             | NP_004073.2             |
| <i>DPP6</i>      | NM_001039350.1_dupl14.1 | NP_001034439.1_dupl14.1 |
| <i>ELP3</i>      | NM_018091.5             | NP_060561.3             |
| <i>EPHA4</i>     | NM_004438.3             | NP_004429.1             |
| <i>ERBB4</i>     | NM_005235.2             | NP_005226.1             |
| <i>FIG4</i>      | NM_014845.5             | NP_055660.1             |
| <i>FUS</i>       | NM_004960.3             | NP_004951.1             |
| <i>GARS1</i>     | NM_002047.2             | NP_002038.2             |
| <i>GRN</i>       | NM_002087.2             | NP_002078.1             |
| <i>HNRNPA1</i>   | NM_002136               | NP_002127               |
| <i>HNRNPA2B1</i> | NM_031243.2             | NP_112533               |
| <i>HNRNPA3</i>   | NM_194247.2             | NP_919223.1             |
| <i>IGHMBP2</i>   | NM_002180.2             | NP_002171.2             |
| <i>MAPT</i>      | NM_001123066.3          | NP_001116538.2          |
| <i>MATR3</i>     | NM_199189.2             | NP_954659.1             |
| <i>NEFH</i>      | NM_021076.3             | NP_066554.2             |
| <i>NEK1</i>      | NM_001199397.1          | NP_001186326.1          |
| <i>OPTN</i>      | NM_021980.4             | NP_068815.2             |
| <i>PFN1</i>      | NM_005022               | NP_005013               |
| <i>PNPLA6</i>    | NM_001166111.1          | NP_001159583.1          |
| <i>REEP1</i>     | NM_001164730.1          | NP_001158202            |
| <i>SETX</i>      | NM_015046.5             | NP_055861.3             |
| <i>SIGMAR1</i>   | NM_005866.2             | NP_005857.1             |
| <i>SOD1</i>      | NM_000454.4             | NP_000445.1             |
| <i>SPAST</i>     | NM_014946.3             | NP_055761.2             |
| <i>SPG11</i>     | NM_025137.3             | NP_079413.3             |
| <i>SQSTM1</i>    | NM_003900.4             | NP_003891.1             |
| <i>TAF15</i>     | NM_139215.2             | NP_631961.1             |
| <i>TARDBP</i>    | NM_007375.3             | NP_031401.1             |
| <i>TREM2</i>     | NM_018965.3             | NP_061838.1             |
| <i>TRPV4</i>     | NM_021625.4             | NP_067638.3             |
| <i>TUBA4A</i>    | NM_001278552            | NP_001265481            |
| <i>UBQLN2</i>    | NM_013444.3             | NP_038472.2             |
| <i>VAPB</i>      | NM_004738.4             | NP_004729.1             |
| <i>VCP</i>       | NM_007126.3             | NP_009057.1             |

**Supplementary Table S2. Criteria applied in the classification of variants identified in ALS genes.**

| <b>Class</b> | <b>Pathogenicity</b>       | <b>Criteria *</b>                                                                                                                                                                                                                                                                                                                                                                                                                                                                                                                                                                                                                                                                                                                                                                                                                                                                                                                                                                                                                  |
|--------------|----------------------------|------------------------------------------------------------------------------------------------------------------------------------------------------------------------------------------------------------------------------------------------------------------------------------------------------------------------------------------------------------------------------------------------------------------------------------------------------------------------------------------------------------------------------------------------------------------------------------------------------------------------------------------------------------------------------------------------------------------------------------------------------------------------------------------------------------------------------------------------------------------------------------------------------------------------------------------------------------------------------------------------------------------------------------|
| <b>5</b>     | Clearly pathogenic         | <p>1. Variants reported in the literature as pathogenic with supporting evidence; multiple independent cases, pedigree segregation studies and/or functional analysis<br/>AND</p> <p>2. Phenotype and inheritance pattern in patient correlates with the gene<br/><b>OR</b></p> <p>1. Null variant (nonsense, frameshift, canonical <math>\pm 1</math> or 2 splice sites, initiation codon, or out of frame exon deletion) in a gene where loss of function is a known mechanism of disease</p>                                                                                                                                                                                                                                                                                                                                                                                                                                                                                                                                    |
| <b>4</b>     | Likely to be pathogenic    | <p>1. Not described in the literature, or weak evidence for pathogenicity in published literature; no segregation or functional analysis available<br/>AND</p> <p>2. Phenotype and inheritance pattern in patient correlates with the gene<br/>AND</p> <p>3. Variants not included in Class5 (Missense/synonymous/intronic) for which location in gene and pathogenic mechanism are compatible with previously described pathogenic variants in the gene<br/>AND</p> <p>4. Multiple lines of computational evidence support a deleterious effect on the gene or gene product (conservation, evolutionary, splicing impact, etc.):</p> <p>a) Missense variant: conserved amino acid, Polyphen 2 (HumVar) and SIFT concur in predicting deleterious effect or at least three splice prediction tools support an effect on splicing</p> <p>b) Synonymous or intronic variants: nucleotide highly conserved across multiple species or three or more splice prediction tools support an effect on splicing or regulatory mechanism</p> |
| <b>3</b>     | Unknown significance (VUS) | <p>1. Other criteria described for class 5, 4, 2 and 1 are not met<br/><b>OR</b></p> <p>1. The criteria for benign and pathogenic are contradictory</p>                                                                                                                                                                                                                                                                                                                                                                                                                                                                                                                                                                                                                                                                                                                                                                                                                                                                            |
| <b>2</b>     | Unlikely to be pathogenic  | <p>1. Allele frequency is greater than expected for the prevalence disorder (&gt;0.02% in the majority of the databases) or observation in controls incompatible with disease penetrance or pattern of inheritance<br/><b>OR</b></p> <p>1. Well-established in vitro or in vivo functional studies show no damaging effect on protein function or splicing<br/><b>OR</b></p> <p>1. A synonymous and intronic variants for which three or more splicing prediction algorithms predict no impact to the splice consensus sequence nor the creation of a new splice site AND the nucleotide is not highly conserved</p>                                                                                                                                                                                                                                                                                                                                                                                                               |
| <b>1</b>     | Clearly not pathogenic     | <p>1. Frequency &gt;1 % in dbSNP or in Exome Variant Server or ExAC</p>                                                                                                                                                                                                                                                                                                                                                                                                                                                                                                                                                                                                                                                                                                                                                                                                                                                                                                                                                            |

\* Modified from Antoniadis et al. (2015)

**Supplementary Table S3. Gene variants in ALS susceptibility genes.**

| Gene           | Variant DNA | Variant protein | MAF*                  | DbSNP       | N. of patient | Patient                                              | Other variants                                                                                                                                                                                                                                                                                                                                                              |
|----------------|-------------|-----------------|-----------------------|-------------|---------------|------------------------------------------------------|-----------------------------------------------------------------------------------------------------------------------------------------------------------------------------------------------------------------------------------------------------------------------------------------------------------------------------------------------------------------------------|
| <i>ATXN2</i>   | c.1472A>G   | p.Asn491Ser     | 0.1% - 0.15% - 0.09%  | rs117851901 | 2             | P011<br>P081                                         | -<br>-                                                                                                                                                                                                                                                                                                                                                                      |
| <i>ATXN2</i>   | c.1955A>G   | p.His652Arg     | 0% - 0% - 0%          |             | 1             | P108                                                 | -                                                                                                                                                                                                                                                                                                                                                                           |
| <i>ATXN2</i>   | c.2294A>G   | p.Asn765Ser     | 0% - 0% - 0.02%       | rs765735723 | 1             | P091                                                 | <b>(AR)</b> <i>SETX</i> : c.2479A>G (p.Lys827Glu) het [rs150532677, MAF*: 0.02% - 0.07% - 0.1% ](Class2);                                                                                                                                                                                                                                                                   |
| <i>ATXN2</i>   | c.2624A>G   | p.Lys875Arg     | 0% - 0% - 0%          |             | 1             | P085                                                 | <b>(Class 2)</b> <i>ERBB4</i> : c.882A>G (p.=) het [rs77309171, MAF*: 0.2% - 0.36% - 0.42% ] (Class2); <i>VAPB</i> : c.390T>G (p.Asp130Glu) het [rs146459055, MAF*: 0.1% - 0.07% - 0.14% ] (Class2);                                                                                                                                                                        |
| <i>ATXN2</i>   | c.2836C>T   | p.Pro946Ser     | 0% - 0% - 0%          | rs771952619 | 1             | P080                                                 | <b>(Suscep.)</b> <i>ATXN2</i> : c.3000A>G (p.=) het [rs140262591, MAF*: 0.2% - 0.31% - 0.3% ]; <i>HNRNPA3</i> : c.625T>C (p.Ser209Pro) het [MAF*: 0% - 0% - 0% ]; <b>(Class 2)</b> <i>GRN</i> : c.264+7G>A het [rs60100877, MAF*: 0.5% - 0.6% - 0.53% ];                                                                                                                    |
| <i>ATXN2</i>   | c.3000A>G   | p.=             | 0.2% - 0.31% - 0.3%   | rs140262591 | 7             | P075<br>P080<br>P014<br>P020<br>P032<br>P058<br>P090 | <b>(ALS genes)</b> <i>OPTN</i> : c.910C>T (p.Leu304Phe) het [MAF*: 0% - 0% - 0% ](Class3);<br><b>(Suscep.)</b> <i>ATXN2</i> : c.2836C>T (p.Pro946Ser) het [rs771952619, MAF*: 0% - 0% - 0% ]; <i>HNRNPA3</i> : c.625T>C (p.Ser209Pro) het [MAF*: 0% - 0% - 0% ]; <b>(Class 2)</b> <i>GRN</i> : c.264+7G>A het [rs60100877, MAF*: 0.5% - 0.6% - 0.53% ];<br>-<br>-<br>-<br>- |
| <i>ATXN2</i>   | c.3322C>T   | p.Pro1108Ser    | 0.04% - 0.11% - 0.07% | rs140242317 | 1             | P112                                                 | <b>(ALS genes)</b> <i>VCP</i> : c.179A>G (p.Lys60Arg) het [MAF*: 0% - 0% - 0% ] (Class3);                                                                                                                                                                                                                                                                                   |
| <i>CRYM</i>    | c.47A>C     | p.His16Pro      | 0% - 0% - 0%          |             | 2             | P016<br>P019                                         | <b>(Class 2)</b> <i>SETX</i> : c.472T>G (p.Leu158Val) het [rs145438764, MAF*: 0.16% - 0.4% - 0.37% ] (Class2); <i>SQSTM1</i> : c.712A>G (p.Lys238Glu) het [rs11548633, MAF*: 0.24% - 0.26% - 0.24% ] (Class2);<br>-                                                                                                                                                         |
| <i>CYP27A1</i> | c.256G>A    | p.Val86Met      | 0.26% - 0.01% - 0.19% | rs200604732 | 1             | P089                                                 | <b>(AR)</b> <i>IGHMBP2</i> : c.2837G>A (p.Arg946Gln) het [rs149824485, MAF*: 0% - 0.08% - 0.07% ] (Class3);                                                                                                                                                                                                                                                                 |
| <i>CYP27A1</i> | c.524C>T    | p.Thr175Met     | 0.56% - 0.58% - 0.17% | rs2229381   | 1             | P114                                                 |                                                                                                                                                                                                                                                                                                                                                                             |
| <i>CYP27A1</i> | c.536A>G    | p.Asn179Ser     | 0% - 0.02% - 0.01%    | rs145080072 | 1             | P037                                                 |                                                                                                                                                                                                                                                                                                                                                                             |
| <i>CYP27A1</i> | c.827A>C    | p.Asn276Thr     | 0% - 0% - 0%          |             | 1             | P013                                                 | <b>(Class 2)</b> <i>GRN</i> : c.264+7G>A het [rs60100877, MAF*: 0.5% - 0.6% - 0.53% ] (Class2);                                                                                                                                                                                                                                                                             |
| <i>DAO</i>     | c.627G>A    | p.Trp209Ter     | 0% - 0% - 0%          | rs766258671 | 1             | P002                                                 | <b>(ALS genes)</b> <i>SQSTM1</i> : c.695C>T (p.Pro232Leu) het [rs757778292, MAF*: 0% - 0% - 0% ](Class4); <b>(Suscep.)</b> <i>DCTN1</i> : c.652G>A (p.Glu218Lys) het [MAF*: 0% - 0% - 0% ];                                                                                                                                                                                 |

| Gene           | Variant DNA | Variant protein | MAF*                  | DbSNP       | N. of patient | Patient                      | Other variants                                                                                                                                                                                                                                          |
|----------------|-------------|-----------------|-----------------------|-------------|---------------|------------------------------|---------------------------------------------------------------------------------------------------------------------------------------------------------------------------------------------------------------------------------------------------------|
| <i>DCTN1</i>   | c.586A>G    | p.Ile196Val     | 0.32% - 0.55% - 0.8%  | rs55862001  | 1             | P028                         | -                                                                                                                                                                                                                                                       |
| <i>DCTN1</i>   | c.652G>A    | p.Glu218Lys     | 0% - 0% - 0%          |             | 1             | P002                         | <b>(ALS genes)</b> <i>SQSTM1</i> : c.695C>T (p.Pro232Leu) het [rs757778292, MAF*: 0% - 0% - 0% ](Class4); <b>(Suscep.)</b> <i>DAO</i> : c.627G>A (p.Trp209Ter) het [rs766258671, MAF*: 0% - 0% - 0%]                                                    |
| <i>DCTN1</i>   | c.1208A>G   | p.Glu403Gly     | 0% - 0% - 0%          |             | 1             | P113                         | <b>(Class 2)</b> <i>SPG11</i> : c.258-6delT het [rs373234269; rs556942992, MAF*: 0.86% - 0.7% - 0.19% ] (Class2); <i>SPG11</i> : c.4687A>G (p.Arg1563Gly) het [rs75430389, MAF*: 0.7% - 0.55% - 0.17% ] (Class2);                                       |
| <i>DCTN1</i>   | c.1955T>G   | p.Phe652Cys     | 0% - 0% - 0%          |             | 1             | P012                         | <b>(Class 2)</b> <i>VAPB</i> : c.390T>G (p.Asp130Glu) het [rs146459055, MAF*: 0.1% - 0.07% - 0.14% ] (Class2);                                                                                                                                          |
| <i>DCTN1</i>   | c.2185-6C>T | p.?             | 0% - 0% - 0%          |             | 1             | P044                         | <b>(AR)</b> <i>IGHMBP2</i> : c.2043G>T (p.Glu681Asp) het [MAF*: 0% - 0% - 0% ] (Class3);                                                                                                                                                                |
| <i>DCTN1</i>   | c.2633A>G   | p.Tyr878Cys     | 0% - 0% - 0%          | rs778201974 | 1             | P098                         | -                                                                                                                                                                                                                                                       |
| <i>DCTN1</i>   | c.2657A>G   | p.Tyr886Cys     | 0% - 0% - 0%          | rs370085138 | 1             | P048                         | -                                                                                                                                                                                                                                                       |
| <i>DCTN1</i>   | c.3529+5G>A | p.?             | 0.26% - 0.69% - 0.59% | rs72466494  | 3             | P067<br>P104<br>P049         | -<br>-<br>-                                                                                                                                                                                                                                             |
| <i>DPP6</i>    | c.1786G>A   | p.Ala596Thr     | 0.1% - 0.19% - 0.15%  | rs188276022 | 1             | P082                         | -                                                                                                                                                                                                                                                       |
| <i>ELP3</i>    | c.1111A>G   | p.Met371Val     | 0% - 0% - 0%          | rs199903018 | 1             | P021                         | -                                                                                                                                                                                                                                                       |
| <i>ELP3</i>    | c.1459C>T   | p.Arg487Trp     | 0.06% - 0.05% - 0.07% | rs139093061 | 1             | P0117                        | <b>(AR)</b> <i>SPG11</i> : c.5314C>T (p.Arg1772Cys) het [rs769001849, MAF*: 0% - 0% - 0% ] (Class2); <i>SETX</i> : c.472T>G (p.Leu158Val) het [rs145438764, MAF*: 0.16% - 0.4% - 0.37% ] (Class2);                                                      |
| <i>EPHA4</i>   | c.1711C>T   | p.Arg571Trp     | 0% - 0.02% - 0.01%    | rs371177966 | 1             | P023                         | -                                                                                                                                                                                                                                                       |
| <i>EPHA4</i>   | c.1946G>A   | p.Cys649Tyr     | 0% - 0% - 0%          |             | 1             | P076                         | <b>(Class 2)</b> <i>GRN</i> : c.264+7G>A het [rs60100877, MAF*: 0.5% - 0.6% - 0.53% ] (Class2);                                                                                                                                                         |
| <i>HNRNPA3</i> | c.196-7T>G  | p.?             | 0.3% - 0.57% - 0.52%  | rs150012936 | 3             | P052<br>P053<br>P078         | -<br>-<br>-                                                                                                                                                                                                                                             |
| <i>HNRNPA3</i> | c.625T>C    | p.Ser209Pro     | 0% - 0% - 0%          |             | 1             | P080                         | <b>(Suscep.)</b> <i>ATXN2</i> : c.3000A>G (p.=) het [rs140262591, MAF*: 0.2% - 0.31% - 0.3% ]; <i>ATXN2</i> : c.2624A>G (p.Lys875Arg) het [MAF*: 0% - 0% - 0% ]; <b>(Class 2)</b> <i>GRN</i> : c.264+7G>A het [rs60100877, MAF*: 0.5% - 0.6% - 0.53% ]; |
| <i>HNRNPA3</i> | c.827A>G    | p.Asn276Ser     | 0.04% - 0.03% - 0%    | rs143598547 | 1             | P084                         | <b>(AR)</b> <i>PNPLA6</i> : c.856C>T (p.Arg286Trp) het [MAF*: 0% - 0% - 0% ] (Class3);                                                                                                                                                                  |
| <i>NEFH</i>    | c.1054C>A   | p.Arg352Ser     | 0.08% - 0.35% - 0.26% | rs149955255 | 4             | P077<br>P051<br>P055<br>P086 | <b>(Class 2)</b> <i>ANG</i> : c.208A>G (p.Ile70Val) het [rs121909541, MAF*: 0.02% - 0.05% - 0.06% ] (Class2);<br>-<br>-<br>-                                                                                                                            |

| Gene         | Variant DNA | Variant protein | MAF*                  | DbSNP       | N. of patient | Patient | Other variants                                                                      |
|--------------|-------------|-----------------|-----------------------|-------------|---------------|---------|-------------------------------------------------------------------------------------|
| <b>NEK1</b>  | c.1942A>G   | p.Lys648Glu     | 0% - 0.01% - 0.01%    | rs371562840 | 1             | P095    | -                                                                                   |
| <b>TREM2</b> | c.184C>T    | p.Arg62Cys      | 0% - 0% - 0.01%       | rs201258314 | 1             | P070    | <b>(Class 2)</b> TRPV4: c.387-6C>T het [rs775634013, MAF*: 0% - 0% - 0% ] (Class2); |
| <b>TREM2</b> | c.469C>T    | p.His157Tyr     | 0.28% - 0.02% - 0.36% | rs2234255   | 1             | P063    |                                                                                     |

\* MAF: Minor Allele frequency (%) in 1000Genomes-Go-ESP-AC databases. het: heterozygous; (ALS genes) Variants in ALS genes; (Suscep.): variants in susceptibility genes; (AR): variants in autosomal recessive genes.

## Supplementary Table S4. Heterozygous gene variants in autosomal recessive ALS genes.

| Gene           | Class | Variant DNA         | Variant protein    | MAF*                  | dbSNP        | Additional variants                                                                                                                                                | Patient |
|----------------|-------|---------------------|--------------------|-----------------------|--------------|--------------------------------------------------------------------------------------------------------------------------------------------------------------------|---------|
| <i>ALS2</i>    | 3     | c.3015T>G           | p.Asp1005Glu       | 0% - 0% - 0%          |              |                                                                                                                                                                    | P042    |
| <i>ALS2</i>    | 3     | c.4226A>G           | p.Gln1409Arg       | 0% - 0% - 0%          |              |                                                                                                                                                                    | P107    |
| <i>ASAH1</i>   | 5     | c.108_114delCTTTGCT | p.Ser36ArgfsTer2   | 0.12% - 0.13% - 0.04% | rs548868946  | (Class 2) TRPV4: c.2518G>A (p.Glu840Lys) het [rs55728855, MAF*: 0.24% - 0.74% - 0.63%]                                                                             | P064    |
| <i>ASAH1</i>   | 3     | c.640G>A            | p.Val214Ile        | 0.06% - 0.02% - 0.02% | rs151320126  |                                                                                                                                                                    | P027    |
| <i>ASAH1</i>   | 3     | c.766A>C            | p.Ile256Leu        | 0% - 0.01% - 0.01%    | rs374187681  |                                                                                                                                                                    | P066    |
| <i>IGHMBP2</i> | 5     | c.653delC           | p.Thr218MetfsTer15 | 0% - 0% - 0%          |              |                                                                                                                                                                    | P109    |
| <i>IGHMBP2</i> | 3     | c.736A>G            | p.Ile246Val        | 0% - 0.01% - 0%       | rs377678376  | (Class 2) TRPV4: c.2248G>A (p.Val750Ile) het [rs148171058, MAF*: 0.08%-0.15%-0.08%]; (Class2) GARS:c.803C>T (p.Thr268Ile) het [rs2230310, MAF*: 0.12%-0.48%-0.32%] | P046    |
| <i>IGHMBP2</i> | 5     | c.752T>G            | p.Leu251Arg        | 0% - 0% - 0%          |              |                                                                                                                                                                    | P003    |
| <i>IGHMBP2</i> | 4     | c.815T>C            | p.Leu272Pro        | 0% - 0% - 0%          | rs773582904  |                                                                                                                                                                    | P038    |
| <i>PNPLA6</i>  | 3     | c.1106G>A           | p.Arg369Lys        | 0% - 0% - 0%          |              |                                                                                                                                                                    | P026    |
| <i>PNPLA6</i>  | 3     | c.1225A>C           | p.Thr409Pro        | 0% - 0% - 0%          |              |                                                                                                                                                                    | P001    |
| <i>PNPLA6</i>  | 3     | c.1621C>T           | p.Arg541Cys        | 0% - 0% - 0%          | rs745665473  |                                                                                                                                                                    | P118    |
| <i>PNPLA6</i>  | 3     | c.3676C>T           | p.Pro1226Ser       | 0% - 0% - 0%          |              | (Class 2) TRPV4: c.2518G>A (p.Glu840Lys) het [rs55728855, MAF*: 0.24% - 0.74% - 0.63%]                                                                             | P102    |
| <i>PNPLA6</i>  | 5     | c.4075C>T           | p.Arg1359Trp       | 0% - 0.02% - 0.01%    | rs3744434303 |                                                                                                                                                                    | P018    |
| <i>SIGMAR1</i> | 4     | c.553G>C            | p.Ala185Pro        | 0% - 0% - 0%          |              |                                                                                                                                                                    | P056    |
| <i>SPG11</i>   | 3     | c.604A>G            | p.Met202Val        | 0.02% - 0% - 0%       | rs201875705  |                                                                                                                                                                    | P031    |
| <i>SPG11</i>   | 3     | c.980T>C            | p.Leu327Pro        | 0% - 0% - 0%          | rs201444186  |                                                                                                                                                                    | P083    |
| <i>SPG11</i>   | 3     | c.3453+8A>T         | p.?                | 0% - 0% - 0%          |              |                                                                                                                                                                    | P068    |

\* MAF: Minor Allele frequency (%) in 1000Genomes-Go-ESP-ExAC databases.

## Supplementary Table S5. Class 2 gene variants

| Gene           | Class | Variant DNA | Variant protein | MAF*                  | dbSNP       | Patient                                      |
|----------------|-------|-------------|-----------------|-----------------------|-------------|----------------------------------------------|
| <i>ANG</i>     | 2     | c.208A>G    | p.Ile70Val      | 0.02% - 0.05% - 0.06% | rs121909541 | P004<br>P116                                 |
| <i>ERBB4</i>   | 2     | c.882A>G    | p.=             | 0.2% - 0.36% - 0.42%  | rs77309171  | P039                                         |
| <i>GARS1</i>   | 2     | c.803C>T    | p.Thr268Ile     | 0.12% - 0.48% - 0.32% | rs2230310   | P009                                         |
| <i>IGHMBP2</i> | 2     | c.1756+4C>T | p:?             | 0% - 0% - 0.02%       | rs778913429 | P036<br>P010<br>P041<br>P047<br>P050<br>P097 |
| <i>SETX</i>    | 2     | c.59G>A     | p.Arg20His      | 0.5% - 0.75% - 0.9%   | rs79740039  | P061<br>P111                                 |
| <i>SETX</i>    | 2     | c.472T>G    | p.Leu158Val     | 0.16% - 0.4% - 0.37%  | rs145438764 | P101<br>P115                                 |
| <i>SETX</i>    | 2     | c.4660T>G   | p.Cys1554Gly    | 0.58% - 0.31% - 0.58% | rs112089123 | P096                                         |
| <i>SPAST</i>   | 2     | c.131C>T    | p.Ser44Leu      | 0.12% - 0.65% - 0.54% | rs121908515 | P060                                         |
| <i>SPG11</i>   | 2     | c.2656T>C   | p.Tyr886His     | 0.4% - 0.38% - 0.14%  | rs139687202 | P040                                         |
| <i>TRPV4</i>   | 2     | c.2498A>G   | p.Asn833Ser     | 0.04% - 0.27% - 0.31% | rs116035946 | P006                                         |
| <i>VAPB</i>    | 2     | c.390T>G    | p.Asp130Glu     | 0.1% - 0.07% - 0.14%  | rs146459055 |                                              |

\* MAF: Minor Allele frequency (%) in 000Genomes-Go-ESP-ExAC databases.
